# Supplementary material
Source: PubMed Central journal article supplement (PMC3320976)
Supplement: supp_M111.299610_jbc.M111.299610-1.pdf [file supp_M111.299610_jbc.M111.299610-1.pdf]

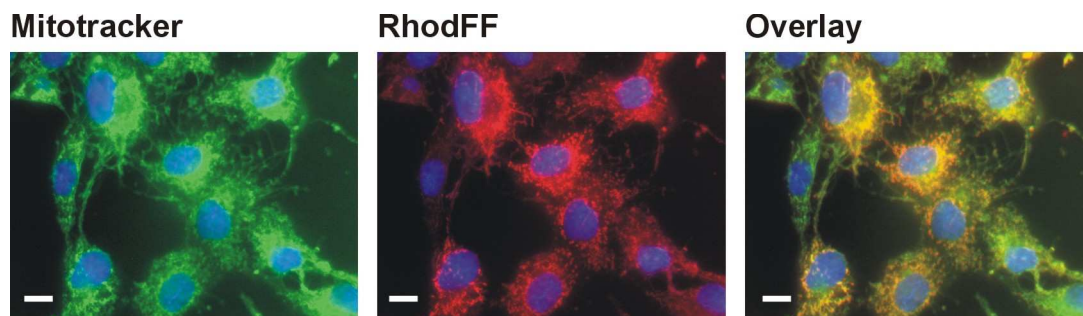

**Figure S1. Mitochondrial localization of RhodFF.** Representative images of RhodFF-loaded MDCK cells counterstained with Mitotracker Green and nuclear Hoechst staining. The images show a punctate RhodFF distribution that matches the distribution of Mitotracker. Scalebar is 10  $\mu\text{m}$ .
